# Supplementary material for: Clinical–Epidemiological Characteristics and IFITM-3 (rs12252) Variant Involvement in HIV-1 Mother-to-Children Transmission Susceptibility in a Brazilian Population
Source: MDPI journal article supplement (doi:10.3390/life13020397), 2023-01-31
Supplement: s1 [file s1]

**Supplementary Table S1.** *CCR5* and *IFITM3* genotypic concordance and discordance in children exposed to HIV-1 and their respective mothers.

| Genotypes<br>Children   mothers | Children Exposed to HIV-1 |                                   | Fisher' Exact Test<br>OR (95%CI), p-value |
|---------------------------------|---------------------------|-----------------------------------|-------------------------------------------|
|                                 | Infected +<br>transmitter | Non-infected +<br>Non-transmitter |                                           |
| <b><i>CCR5</i>Δ32</b>           | <b><i>n=80</i></b>        | <b><i>n=104</i></b>               |                                           |
| wt/wt wt/wt                     | 74                        | 99                                | Reference                                 |
| wt/Δ32 wt/Δ32                   | 1                         | 3                                 | 0.45 (0.01-5.70), 0.638                   |
| wt/wt wt/Δ32                    | 2                         | 2                                 | 1.34 (0.09-18.82), 1.000                  |
| wt/Δ32  wt/wt                   | 3                         | 0                                 | Nc                                        |
| Concordant                      | 75                        | 102                               | Reference                                 |
| Discordant                      | 5                         | 2                                 | 3.38 (0.53-36.35), 0.242                  |
| <b><i>IFITM3</i></b>            | <b><i>n=78</i></b>        | <b><i>n=101</i></b>               |                                           |
| TT TT                           | 46                        | 63                                | Reference                                 |
| TT TC                           | 6                         | 17                                | 0.49 (0.14-1.42), 0.168                   |
| TC TC                           | 17                        | 12                                | 1.93 (0.78-4.90), 0.143                   |
| TC TT                           | 6                         | 7                                 | 1.17 (0.30-4.38), 0.777                   |
| CC TC                           | 2                         | 1                                 | 2.71 (0.14-163.95), 0.575                 |
| CC CC                           | 1                         | 0                                 | Nc                                        |
| TC CC                           | 0                         | 1                                 | Nc                                        |
| Concordant                      | 64                        | 75                                | Reference                                 |
| Discordant                      | 14                        | 26                                | 0.63 (0.28-1.38), 0.278                   |

OR = Odds ratio; CI95% = 95% Confidence Interval; n = sample number
